# Supplementary material for: The Occurrence of Zearalenone in South Korean Feedstuffs between 2009 and 2016
Source: PubMed Central journal article supplement (PMC5535170; doi:10.3390/toxins9070223), 2017-07-15
Supplement: toxins-09-00223-s001.pdf [file toxins-09-00223-s001.pdf]

## Supplementary Materials: The Occurrence of Zearalenone in South Korean Feedstuffs between 2009 and 2016

Hansub Chang, Woori Kim, Ju-Hee Park, Dongho Kim, Choong-Ryeol Kim, Soohyun Chung and Chan Lee

**Table S1.** Classification of compound feeds for cattle.

| Feed Type             | Period for feeding                      |
|-----------------------|-----------------------------------------|
| Early breeding calf   | Birth to 3 months                       |
| Middle breeding calf  | 3 to 6 months                           |
| Late breeding calf    | 6 to 12 months                          |
| Sire or breeding bull | After 13 months                         |
| Gestating beef        | 13 months to farrowing                  |
| Lactating beef        | Farrowing to 3 months after birth       |
| Early beef calf       | Before 3 months                         |
| Middle beef calf      | After 3 months to 250 kg of body weight |
| Early beef cattle     | 250 kg to 400 kg of body weight         |
| Middle beef cattle    | 400 kg to 500 kg of body weight         |
| Late beef cattle      | Over 500 kg of body weight              |

**Table S2.** Classification of compound feeds for swine.

| Feed Type             | Period for feeding                                     |
|-----------------------|--------------------------------------------------------|
| Sucking piglet        | Before lactating                                       |
| Weanling piglet       | Over 5 kg of b.w. or after lactating to 20 kg of b.w.  |
| Early growing pig     | 20 kg to 50 kg of b.w.                                 |
| Late growing pig      | 50 kg to 80 kg of b.w.                                 |
| Growing pig           | 50 kg or 80 kg of b.w. to before the 15th for shipment |
| Growing-finishing pig | Before the 15th for shipment to shipment               |
| Sire, boar            | Over 25 kg of b.w.                                     |
| Gilt                  | 25 kg of b.w. to before pregnant                       |
| Gestating sow         | Gestating period                                       |
| Lactating sow         | Lactating period                                       |

**Table S3.** Classification of compound feeds for poultry.

| Feed Type             | Period for feeding                     |
|-----------------------|----------------------------------------|
| Early layer chicks    | Before 6 to 10 weeks                   |
| Middle layer chicks   | 6 to 12 weeks or 2 weeks before laying |
| Late layer chicks     | 12 weeks to 2 weeks before laying      |
| Early broiler chicks  | 3 weeks or before 6 weeks              |
| Middle broiler chicks | 3 weeks or 6 weeks to before laying    |

|                   |                                              |
|-------------------|----------------------------------------------|
| Before laying     | 2 weeks before laying to laying commencement |
| Early laying      | Laying commencement to 40 weeks              |
| Middle laying     | 40 weeks to 65 weeks                         |
| Late laying       | After 65 weeks                               |
| Breeding broiler  | Layer breeder or broiler breeder             |
| Early broiler     | Before 3 weeks                               |
| Middle broiler    | 3 weeks to before the 7-10th before shipment |
| Finishing broiler | After the 7-10th before shipment to shipment |

**Table S4.** Classification of compound feeds for dairy cows.

| <b>Feed Type</b>             | <b>Period for feeding</b>                                                 |
|------------------------------|---------------------------------------------------------------------------|
| Early dairy calf             | Birth to 3 months                                                         |
| Middle dairy calf            | 3 months to 6 months                                                      |
| Late dairy calf              | 6 months to before pregnancy                                              |
| Gestating dairy cow          | Pregnancy to 2 months after farrowing                                     |
| Dairy sires                  | After 13 months                                                           |
| Dairy cow in early lactation | After farrowing to lactation 3 months<br>(31 to 40 kg of milk production) |
| Dairy cow in mid lactation   | Lactation 3 months to 6 months<br>(21-30 kg of milk production)           |
| Dairy cow in late lactation  | Lactation 6 months to dry period<br>(11-20 kg of milk production)         |
| Dairy cow on dry             | Dry period<br>(Less than 10 kg of milk production)                        |
| High yielding dairy cow      | Over 40 kg of milk production                                             |

**Table S5.** Classification of feed ingredients.

| <b>Class</b>              | <b>Feed type</b>        |
|---------------------------|-------------------------|
| Grains                    | Grains                  |
| Grain byproducts (Bran)   | Grain products          |
|                           | Corn gluten feed        |
|                           | Soybean hull            |
|                           | Wheat shorts            |
|                           | Cotton seeds hull       |
|                           | Wheat bran              |
|                           | Corn bran               |
| Meal (Vegetable proteins) | Other grain byproducts  |
|                           | Soybean meal            |
|                           | Wheat gluten            |
|                           | Corn gluten meal        |
|                           | Corn germ meal          |
|                           | Distillers dried grains |
|                           | Coffee meal             |

|                   |                   |
|-------------------|-------------------|
|                   | Palm oil meal     |
|                   | Other meal        |
| Fibrous feed      | Fibrous feed      |
| Food byproducts   | Food byproducts   |
| Beans             | Beans             |
| Seed nuts         | Seed nuts         |
| Mixed formulation | Mixed formulation |

---
